# Supplementary material
Source: PubMed Central journal article supplement (PMC3869525)
Supplement: NIHMS526130-supplement-Supplemental_tables.pdf [file NIHMS526130-supplement-Supplemental_tables.pdf]

## SUPPLEMENTARY TABLES

**Table S1 Association analysis of three *Abraxas* tagSNPs with breast cancer**

| TagSNP     | Minor allele | MAF cases | MAF controls | P-value <sup>a</sup> |
|------------|--------------|-----------|--------------|----------------------|
| rs12499395 | T            | 0.44      | 0.46         | 0.292                |
| rs12649417 | A            | 0.50      | 0.48         | 0.179                |
| rs13125836 | A            | 0.09      | 0.08         | 0.140                |

<sup>a</sup> Cochran-Armitage trend test

**Table S2 LOH analysis of laser-capture microdissected tumor cell DNA of *Abraxas* c.1082G>A germline mutation carriers**

| Case     | Tumor type   | Confirmation of presence of germline <i>Abraxas</i> c.1082G>A mutation from patient's tumor by sequencing analysis | LOH status for <i>Abraxas</i> |
|----------|--------------|--------------------------------------------------------------------------------------------------------------------|-------------------------------|
| BR-0194  | Breast       | Yes                                                                                                                | Negative                      |
| B2       | Breast       | Yes                                                                                                                | Negative                      |
| BR-02101 | Endometrial  | Yes                                                                                                                | Negative                      |
| 98-063   | Breast       | Yes                                                                                                                | Negative                      |
| B10962   | Fibrosarcoma | Yes                                                                                                                | Negative                      |
| B3346    | Colon        | Yes                                                                                                                | Negative                      |

**Table S3 *Abraxas* primers and PCR amplicon details**

| Exon           | Forward primer (5'-3')      | Reverse primer (5'-3')   | Amplicon size (bp) |
|----------------|-----------------------------|--------------------------|--------------------|
| 1              | GCCCTCGTCCTCTTGTGTAG        | AGGGGGAGAGAAGGCAGAG      | 272                |
| 2              | CCCCGACTGGTAGCACATA         | TTGCCCAGCCTCTGTATTTC     | 323                |
| 3              | CTTCCTGGCGTGAGGTAAG         | CAGAGAAAGAACTGCTAGGGTTG  | 318                |
| 4              | GGGCTTTGGTAGTTGGGTTA        | GCAACCACTTTCAATTTCTGG    | 334                |
| 5              | AAGAAAGCCATTTTAAGGTTGTT     | TGATGCGACAATATATGAGAACAC | 397                |
| 6              | TTTTTAAATCTTGTAGGGGACAA     | TCCCTTGAATTTTATTCTGCTG   | 311                |
| 7              | GGTTTTGTGGTTGGTTTTTCT       | CATAGCCTTCATTAAGCAACTCA  | 382                |
| 8              | TGCTTGTTACTGACATCCTCCA      | CACCTTTGCACTCCAACCTA     | 384                |
| 9 <sup>a</sup> | TTGTCTTAGAATACTGTGGCATATAAA | TGAGTTCCACTGGCCTATCC     | 1374               |

<sup>a</sup> Exon 9 has extensive similarity with other genomic contigs, predominantly with chr. 3 and 8. To avoid non-specific priming, a part of intron 8, the coding part of exon 9 and a portion of the 3' UTR have been amplified in a single fragment, and was directly sequenced. Exon 1 was also analyzed by direct sequencing.

**Table S4 iPlex primers used for *Abraxas* c.1082G>A and tagSNP genotyping**

| Variation  | PCR primer sequence*                                                   | Extension primer sequence*  |
|------------|------------------------------------------------------------------------|-----------------------------|
| c.1082G>A  | F: acgttggatgCAGCTAGTACACCACAAATC<br>R: acgttggatgGATCGTTTGTCTTGTGTATC | tgTGTCTTGTGTATCTAACAAC      |
| rs12499395 | F: acgttggatgCATAGTTGACTTAACAGCCC<br>R: acgttggatgTCATTGGCTAGGAACAGCCC | CCCAGCTTTGGACCTAC           |
| rs12649417 | F: acgttggatgGACAAGCATCATATGGCACC<br>R: acgttggatgCATCTTCTAAACGTTCTAC  | cccTCTTCTAAACGTTCTACAGATAAT |
| rs13125836 | F: acgttggatgGGATGCTTTATCTTGGTTAC<br>R: acgttggatgCAAGAGATCTCGGTTGTTAG | TTGGTTACTACTACCAGTAT        |

F = Forward primer

R = Reverse primer

\*bases in lower case letters are non-templated bases
