# Supplementary material
Source: PubMed Central journal article supplement (PMC3869525)

# SUPPLEMENTARY FIGURE 1

**A**

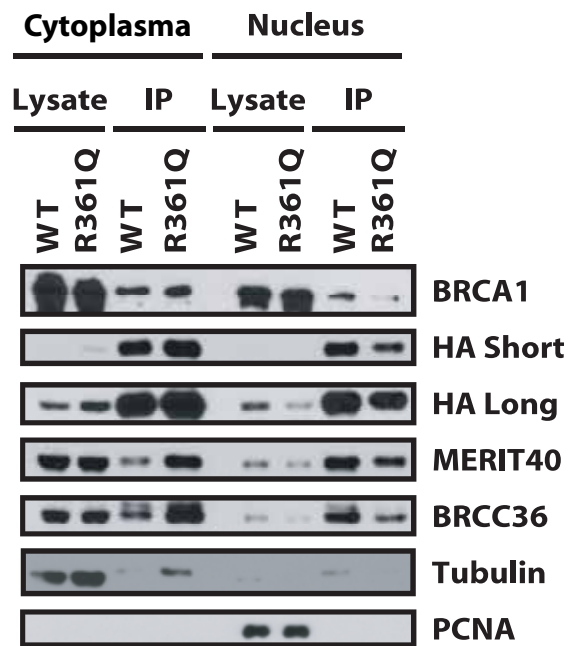

**B**

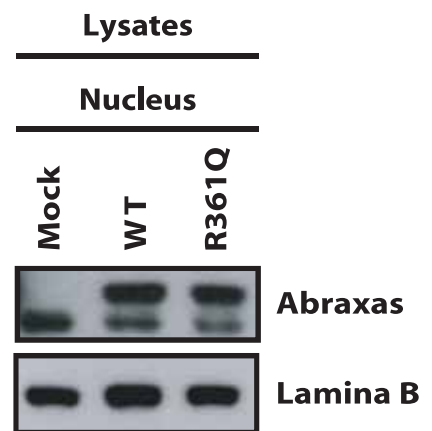

# SUPPLEMENTARY FIGURE 2

A

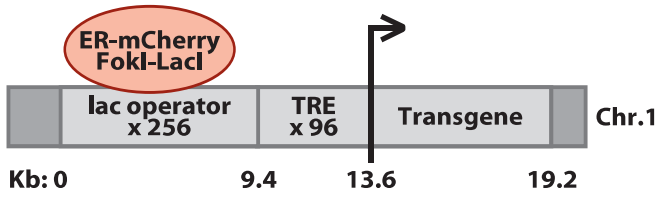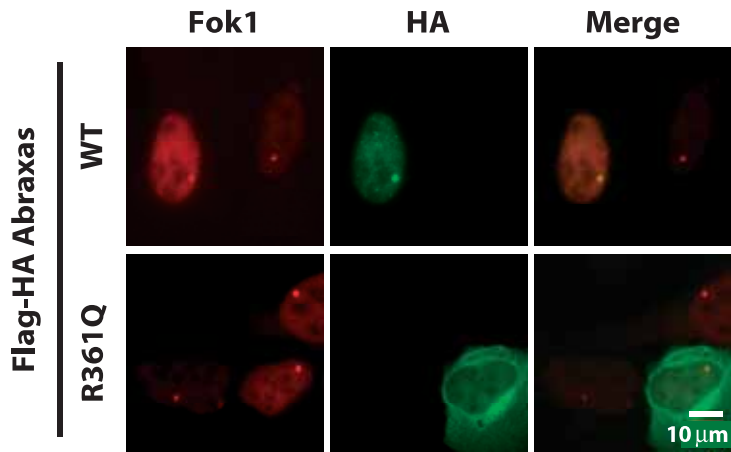

B

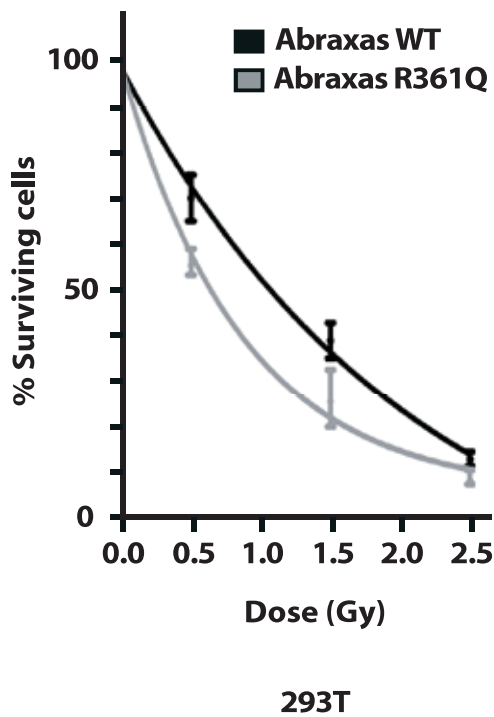

C

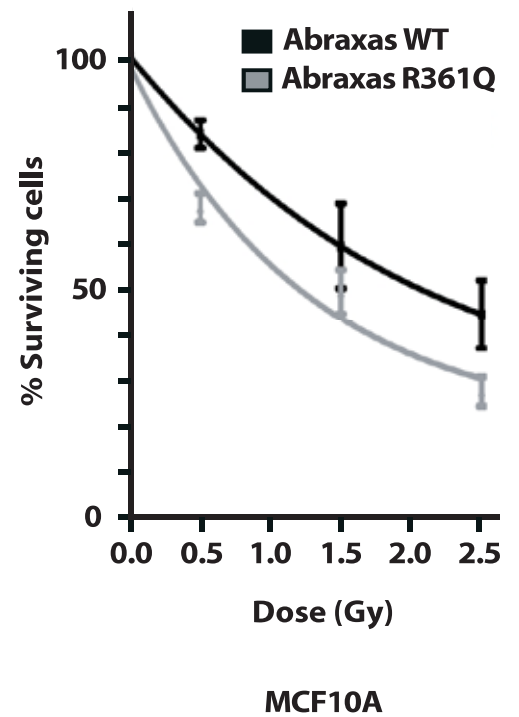

# SUPPLEMENTARY FIGURE 3

**A**

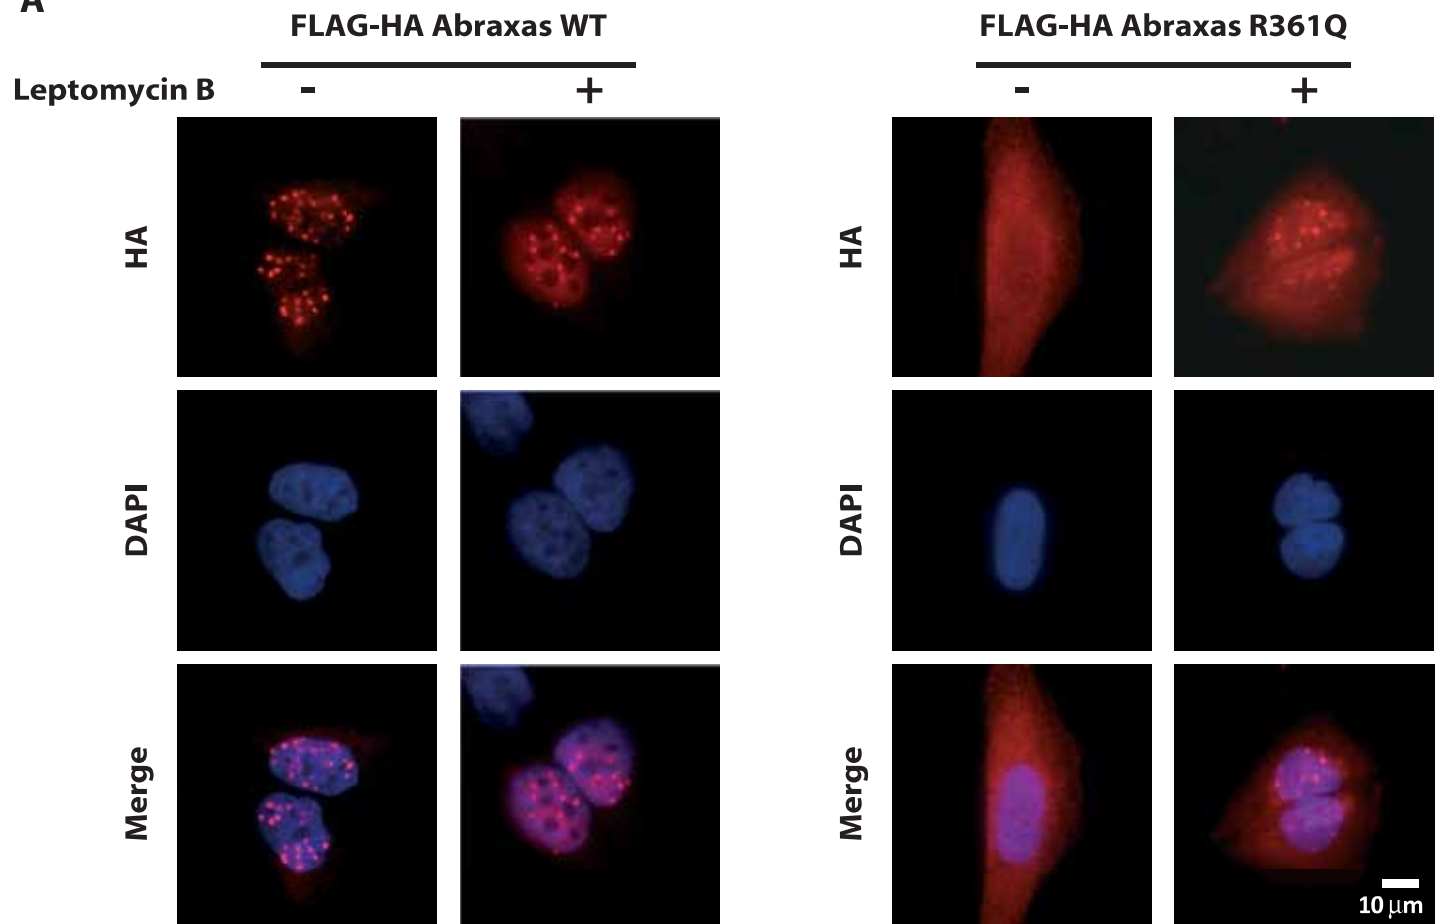

**B**

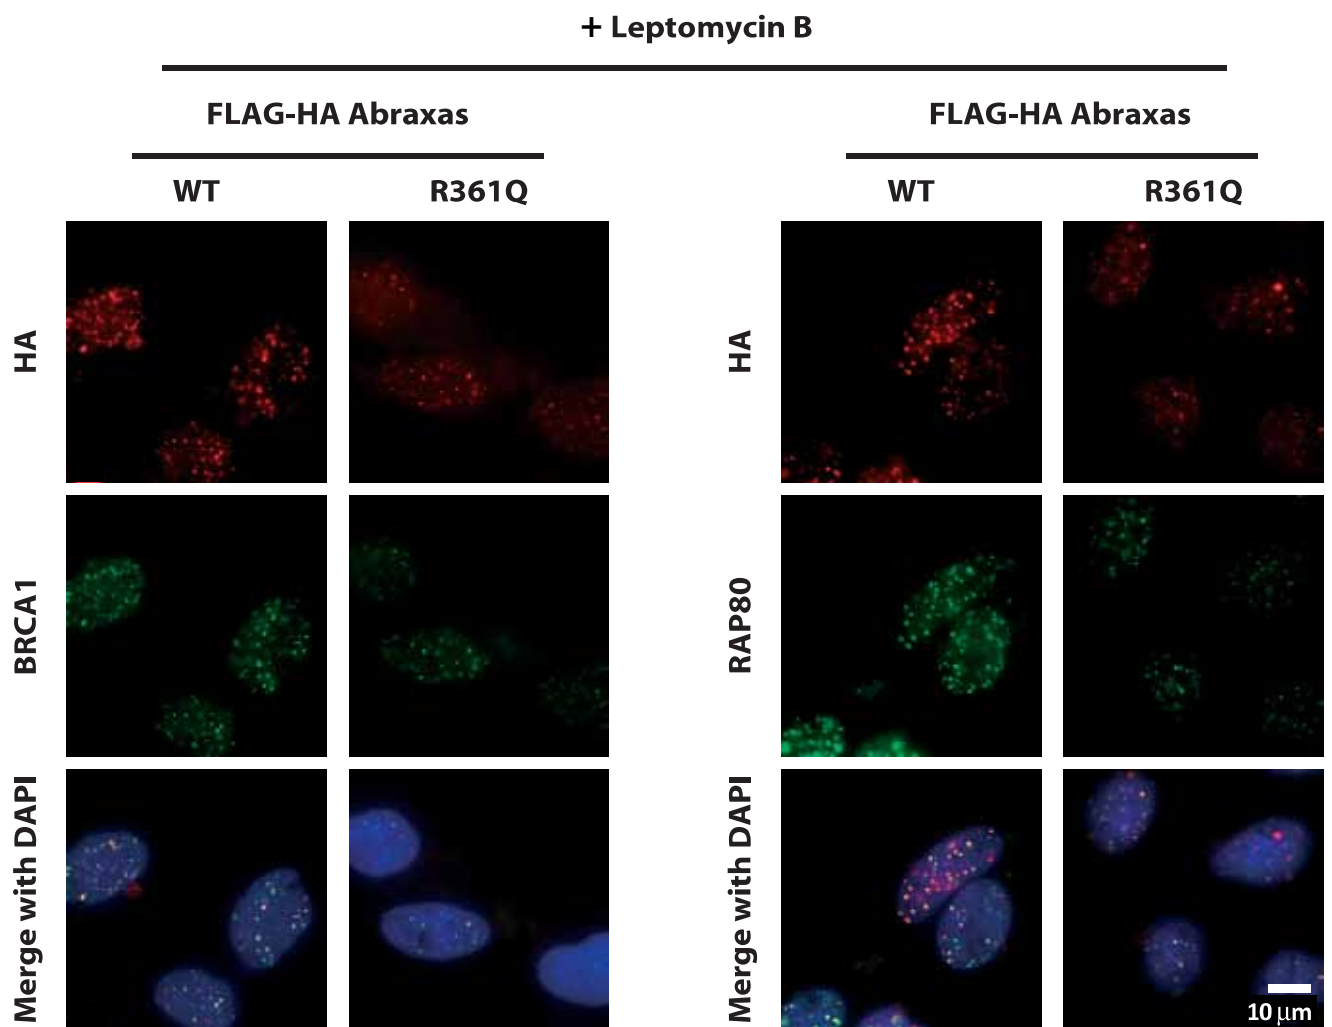

## SUPPLEMENTARY FIGURE 4

**A**

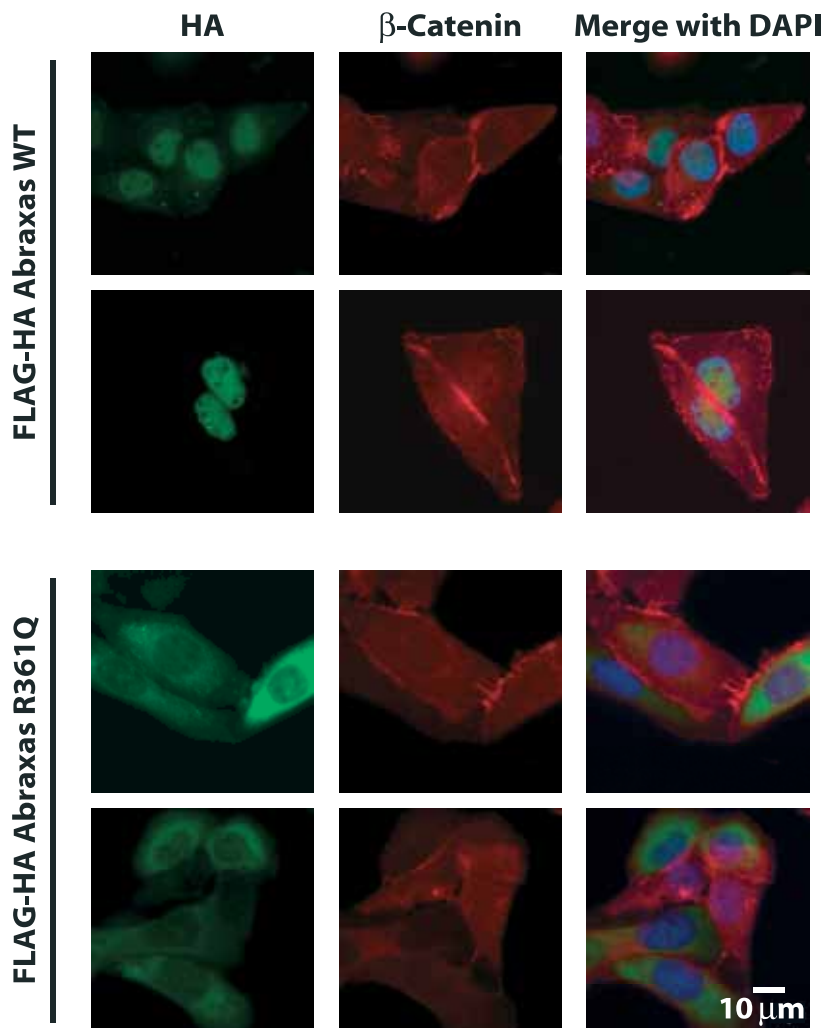

**B**

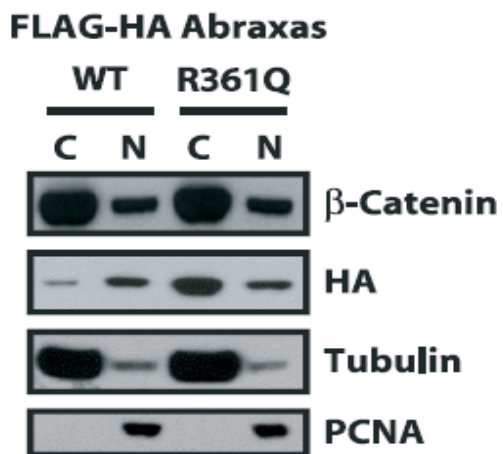

Supplement: NIHMS526130-supplement-Supplementary_Data.pdf [file NIHMS526130-supplement-Supplementary_Data.pdf]
